# Supplementary material for: Combined Effect of Naturally-Derived Biofilm Inhibitors and Differentiated HL-60 Cells in the Prevention of Staphylococcus aureus Biofilm Formation
Source: MDPI journal article supplement (doi:10.3390/microorganisms8111757), 2020-11-09
Supplement: s1 [file s1]

**Table S1** previously reported antimicrobial activity and anti-biofilm potencies of the biofilm inhibitors. DHA1 and DHA2 are coded 11 and 9b, respectively in [1] while FLA1 is coded 291 in [2].

|      | Biofilms IC <sub>50</sub> (μM) |               | Planktonic bacteria |
|------|--------------------------------|---------------|---------------------|
|      | Pre-exposure                   | Post-exposure | MIC (μM)            |
| DHA1 | 9.4                            | 27.9          | 15                  |
| DHA2 | 33.2                           | 86.1          | 60                  |
| FLA1 | 10.2                           | 27.9          | 20                  |

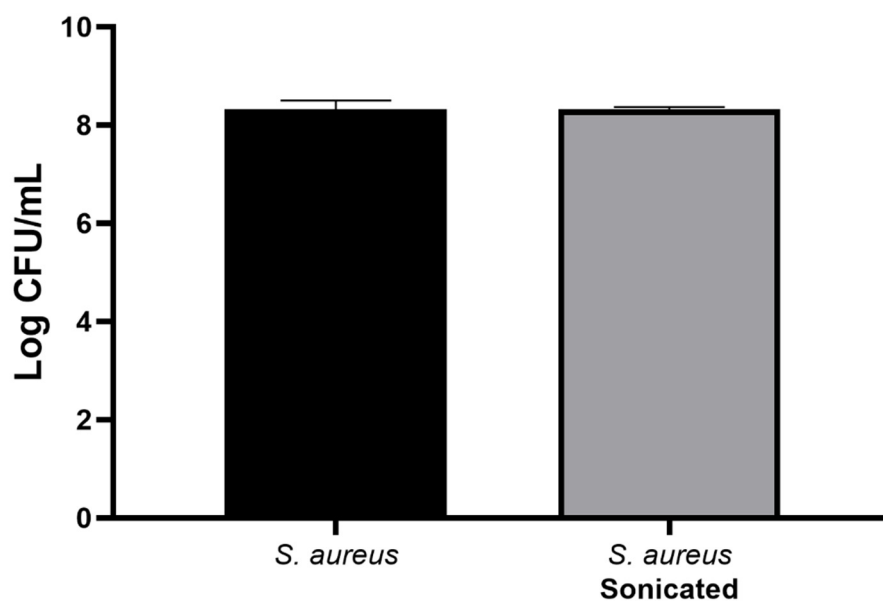

**Figure S1** Comparison between viable *S. aureus* ATCC 25923 after exposing an inoculum of 10<sup>8</sup> CFU/mL to 10 min sonication at 35 kHz. Results expressed as mean + SD (n=3), experiment repeated twice.

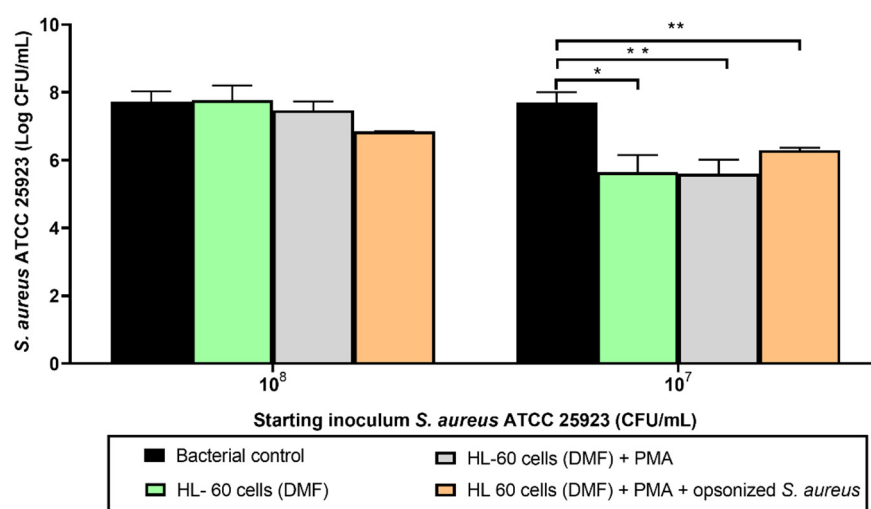

**Figure S2** Viable counts of 24 h old biofilms formed by different concentrations of *S. aureus* ATCC 25923 co-cultured with HL-60 cells on 96-well microplates. Black columns represent the bacterial control (viable attached cells in the absence of HL-60 cells). Green columns show the co-culture of *S. aureus* ATCC 25923 with HL-60

cells differentiated with DMF. Grey columns show the co-culture of *S. aureus* ATCC 25923 with HL-60 cells differentiated with DMF and activated with PMA. Orange columns represent the co-culture of opsonized *S. aureus* with HL-60 cells differentiated with DMF and activated with PMA. Values are means and SD of two or more independent experiments (\*\* $p < 0.001$ ; \*\* $p < 0.01$ ;  $p^* < 0.05$ )

## References

1. Manner, S.; Vahermo, M.; Skogman, M.E.; Krogerus, S.; Vuorela, P.M.; Yli-Kauhaluoma, J.; Fallarero, A.; Moreira, V.M. New derivatives of dehydroabietic acid target planktonic and biofilm bacteria in *Staphylococcus aureus* and effectively disrupt bacterial membrane integrity. *European journal of medicinal chemistry* **2015**, *102*, 68-79, doi:10.1016/j.ejmech.2015.07.038.
2. Manner, S.; Skogman, M.; Goeres, D.; Vuorela, P.; Fallarero, A. Systematic Exploration of Natural and Synthetic Flavonoids for the Inhibition of *Staphylococcus aureus* Biofilms. *International journal of molecular sciences* **2013**, *14*, 19434-19451, doi:10.3390/ijms141019434.
